# Supplementary material
Source: publisher figshare collection journal article supplement (https://frontiersin.figshare.com/ndownloader/files/25444274)
Supplement: Supplementary file 1 [file 25444274]

**Supplementary Table S2.** Shape changes for minimum (Min; scale factor: -0.1) and maximum (Max, scale factor: 0.1) values of the first two components (PC1 and PC2) for each vertebral region. a-p: anteroposterior; +: more; NP: neural process; TP: transverse process.

|                     |                                                         | PC1 |                                                                                                | PC2                                                                                                  |                                                                                                                                  |
|---------------------|---------------------------------------------------------|-----|------------------------------------------------------------------------------------------------|------------------------------------------------------------------------------------------------------|----------------------------------------------------------------------------------------------------------------------------------|
|                     |                                                         | Min | Max                                                                                            | Min                                                                                                  | Max                                                                                                                              |
| <b>Cv</b>           |                                                         |     |                                                                                                |                                                                                                      |                                                                                                                                  |
| <b>Center</b>       | Wider but lower faces                                   |     | Slightly compressed a-p, taller but narrower faces                                             | Anterior face slightly larger, posterior face notably larger                                         | Slightly smaller faces                                                                                                           |
| <b>NP</b>           | Lower, greater caudal inclination                       |     | Taller, + robust                                                                               | Slightly shorter and less inclined caudally                                                          | Slightly taller                                                                                                                  |
| <b>TP</b>           | Longer, narrower                                        |     | Shorter, + robust                                                                              | + robust, both in anterior and dorsal view                                                           | Narrower. Extremes placed + ventrally                                                                                            |
| <b>Th</b>           |                                                         |     |                                                                                                |                                                                                                      |                                                                                                                                  |
| <b>Center</b>       | Anterior face + concave                                 |     | More vertical orientation<br>Larger faces (height and width)                                   |                                                                                                      |                                                                                                                                  |
| <b>NP</b>           | Slightly taller                                         |     | Shorter and slightly wider                                                                     | Wider. More caudal inclination                                                                       | Narrower                                                                                                                         |
| <b>TP</b>           | Slightly shorter                                        |     | Placed + dorsally on the NP.<br>Extremes placed further from each other (due to wider centra). | Wider.<br>Less anterior inclination, Extremes placed further from each other and of dorsal position. | Narrower and with less caudal orientation. Placed + dorsally on the NP. Extremes of + ventral position and closer to each other. |
| <b>Zigapophysis</b> | Well developed. Lower                                   |     | Less developed. Higher                                                                         | Well developed. Lower                                                                                | Less developed. Higher                                                                                                           |
| <b>Thm</b>          |                                                         |     |                                                                                                |                                                                                                      |                                                                                                                                  |
| <b>Center</b>       | Longer centra. Smaller faces                            |     | Slightly compressed a-p. Larger faces                                                          |                                                                                                      | Smaller and + convex anterior face + concave posterior face                                                                      |
| <b>NP</b>           | Longer and wider                                        |     | Shorter and narrower                                                                           |                                                                                                      | Slightly longer                                                                                                                  |
| <b>TP</b>           | Shorter. + inclined ventrally + robust in anterior view |     | Longer; + perpendicular (less inclined ventrally)                                              | + anterior orientation                                                                               | + inclined ventrally, extremes placed + ventrally                                                                                |
| <b>Zigapophysis</b> | Well developed                                          |     | Less developed                                                                                 | + distant to each other                                                                              | Less developed                                                                                                                   |

**Supplementary Tables S2.** Continuation

|                     |                                                  | PC1 |                                                                                   | PC2                                                                                         |                                                                                              |
|---------------------|--------------------------------------------------|-----|-----------------------------------------------------------------------------------|---------------------------------------------------------------------------------------------|----------------------------------------------------------------------------------------------|
|                     |                                                  | Min | Max                                                                               | Min                                                                                         | Max                                                                                          |
| <b>ThTa</b>         |                                                  |     |                                                                                   |                                                                                             |                                                                                              |
| <b>Center</b>       | Longer                                           |     | Compressed a-p                                                                    | Larger faces, especially the posterior one                                                  | Center shape changes in such way that the ventral area is more caudal than the dorsal area   |
| <b>NP</b>           | + anterior inclination                           |     | Slightly shorter and narrower                                                     |                                                                                             | Narrower and + inclined caudally                                                             |
| <b>TP</b>           |                                                  |     | Slightly longer, less inclined caudally. Extremes with slightly + dorsal position | Narrower in the proximal area                                                               | Wider in the middle, + anterior extremes. Anterior edge is + ventral than the posterior one. |
| <b>Metapophysis</b> | Well-developed. Higher                           |     | Lower, Less developed                                                             |                                                                                             | Well-developed. Higher                                                                       |
| <b>TaTm</b>         |                                                  |     |                                                                                   |                                                                                             |                                                                                              |
| <b>Center</b>       | Longer                                           |     | Notably + compressed a-p                                                          | Slightly longer a-p                                                                         | Lower                                                                                        |
| <b>NP</b>           | Slightly longer, and slight anterior inclination |     | Shorter and narrower                                                              | Slightly longer. Wider                                                                      |                                                                                              |
| <b>TP</b>           | Straight. Extremes + ventral                     |     | Narrower. Extremes + dorsal. Slightly curved anteriorly.                          | Ventral orientation. Extremes + ventral. Anterior inclination. Slightly concave anteriorly. | Slightly longer. Perpendicular orientation to sagittal axis. Extremes + caudal               |
| <b>Metapophysis</b> | Less developed. Higher                           |     | Well developed                                                                    | Well developed                                                                              |                                                                                              |
| <b>Tm</b>           |                                                  |     |                                                                                   |                                                                                             |                                                                                              |
| <b>Center</b>       | Larger faces                                     |     | + compressed. Vertical axis perpendicular to the longitudinal.                    |                                                                                             | Slightly compressed a-p.                                                                     |
| <b>NP</b>           | + Robust. Greater anterior inclination           |     | Narrower, especially in the join arch-spine.                                      | Wider. Less anterior inclination                                                            | Narrower. Marked anterior inclination                                                        |
| <b>TP</b>           | Slightly anterior inclination                    |     | Narrower, longer and marked anterior inclination. Extremes placed higher          | + ventral extremes Perpendicular to the longitudinal axis                                   | Marked anterior inclination                                                                  |
| <b>Metapophysis</b> | Less developed                                   |     | Less developed.                                                                   | Less developed                                                                              | Well developed                                                                               |

**Supplementary Tables S2.** Continuation

|                     |                                   | PC1                                                                                                                |                                                                 | PC2                                                                  |     |
|---------------------|-----------------------------------|--------------------------------------------------------------------------------------------------------------------|-----------------------------------------------------------------|----------------------------------------------------------------------|-----|
|                     |                                   | Min                                                                                                                | Max                                                             | Min                                                                  | Max |
| <b>TmTp</b>         |                                   |                                                                                                                    |                                                                 |                                                                      |     |
| <b>Center</b>       | Notably larger faces, Longer a-p  | Smaller facess. The vertical axis is inclined: dorsal area is more posterior with respect to the extreme of the NP | Larger faces                                                    | Slightly compressed a-p                                              |     |
| <b>NP</b>           | Longer and wider                  | Longer in relation to center height, but lower and with greater anterior inclination                               | Shorter and wider                                               | Longer, narrower and + inclined ateriorly                            |     |
| <b>TP</b>           | Shorter. Extremos + dorsales      | Well developed, narrower and with greater anterior inclination                                                     | + Inclined anteriorly                                           | Anterior edge + ventral than the posterior. Less inclined anteriorly |     |
| <b>Metapophysis</b> | Well-developed                    | Well-developed and placed closer to the NP extreme                                                                 | Less developed. Lower                                           | Well-developed. Higher                                               |     |
| <b>TP</b>           |                                   |                                                                                                                    |                                                                 |                                                                      |     |
| <b>Center</b>       | Large convex faces                | Smaller and + compressed a-p; dorsal area of the center becomes + posterior with respect to the NP extreme         | Longer a-p<br>Insertion site for chevrons is relatively smaller | + compressed a-p<br>Insertion site for chevrons is relatively larger |     |
| <b>NP</b>           | Shorter                           | Taller and well developed                                                                                          | Shorter                                                         | Longer                                                               |     |
| <b>TP</b>           | Less conspicuous                  | Notably larger                                                                                                     | Well-developed and inclined anteriorly                          | Shorter, extremes placed more posteriorly                            |     |
| <b>Metapophysis</b> | Poorly developed                  | Well-developed. Higher                                                                                             | Well-developed. Lower                                           | Higher. Less distant from each other.                                |     |
| <b>TS</b>           |                                   |                                                                                                                    |                                                                 |                                                                      |     |
| <b>Center</b>       | Taller, longer and notably convex | Shorter, + compressed a-p.                                                                                         | Large convex faces<br>+ compressed a-p                          | Laterally + compressed, flatter faces                                |     |
| <b>NP</b>           | Less conspicuous                  | Taller                                                                                                             | Less conspicuous                                                | Taller                                                               |     |
| <b>Metapophysis</b> | Less conspicuous                  | Well-developed. Higher                                                                                             | Less conspicuous                                                | Well-developed. Higher                                               |     |
